# Supplementary material for: The intronic branch point sequence is under strong evolutionary constraint in the bovine and human genome
Source: PubMed Central journal article supplement (PMC8531310; doi:10.1038/s42003-021-02725-7), 2021-10-21
Supplement: 42003_2021_2725_MOESM3_ESM.pdf [file 42003_2021_2725_MOESM3_ESM.pdf]

## Description of Additional Supplementary Files

**File name:** Supplementary Data 1

**Description:** Description and variability of branch point sequences identified in the bovine genome using BPP. Source data to generate Figures 3 and 4.

**File name:** Supplementary Data 2

**Description:** European Nucleotide Archive accession numbers for raw DNA sequencing data used to establish the variant catalogue.

**File name:** Supplementary Data 3

**Description:** European Nucleotide Archive accession numbers for raw RNA sequencing data used to establish the splicing QTL mapping cohort.

**File name:** Supplementary Data 4

**Description:** Source data to generate Figure 1a.

**File name:** Supplementary Data 5

**Description:** Source data to generate Figure 1b.

**File name:** Supplementary Data 6

**Description:** Source data to generate Figure 1c.

**File name:** Supplementary Data 7

**Description:** Source data to generate Figure 2.

**File name:** Supplementary Data 8

**Description:** Source data to generate Figure 5.

**File name:** Supplementary Data 9

**Description:** Description and variability of branch point sequences identified in the human genome using BPP. Source data to generate Figure 6.

**File name:** Supplementary Data 10

**Description:** Source data to generate the Manhattan plots in Figure 7 and 8.

**File name:** Supplementary Data 11

**Description:** Source data to generate beeswarm plots in Figure 7 and 8.
